# Supplementary material
Source: PubMed Central journal article supplement (PMC6125890)
Supplement: rspb20181373supp1.pdf [file rspb20181373supp1.pdf]

A morphological novelty evolved by co-option of a reduced gene regulatory network and gene recruitment in a beetle

**Authors**

Yonggang Hu<sup>1</sup>, Christian Schmitt-Engel<sup>1</sup>, Jonas Schwirz<sup>1</sup>, Nadi Stroehlein<sup>2</sup>, Tobias Richter<sup>2</sup>, Upalparna Majumdar<sup>2</sup>, Gregor Bucher<sup>1\*</sup>

**Supplementary Material**

**Figure S1-S7**

**Table S1-S4**

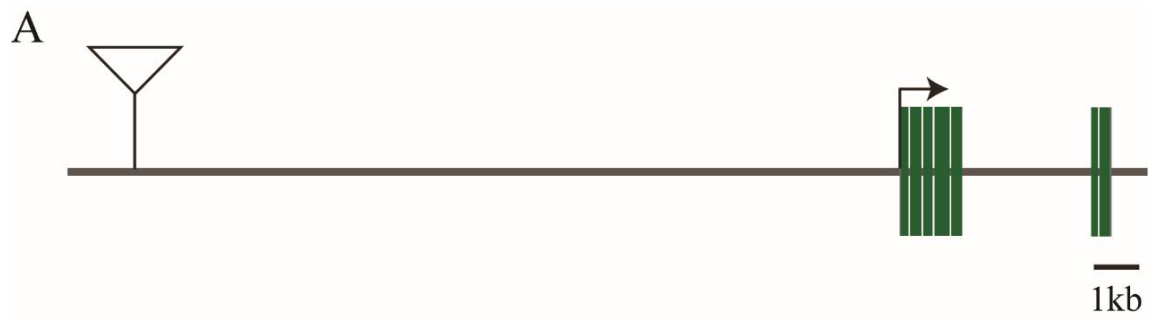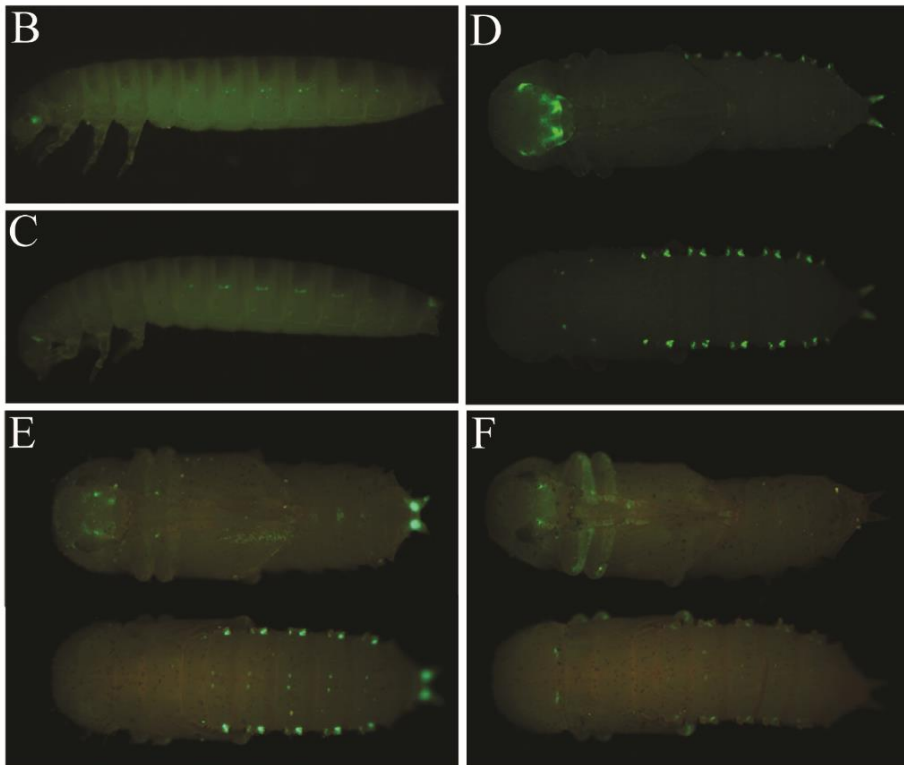

Fig. S1. Characterization of the Gal4 enhancer trap line *G0Gal41152*. (A) The insertion site of the construct is upstream of gene *Tc033998* (based on NCBI annotation a sodium-coupled monocarboxylate transporter). dsRNA targeting *Tc033998* did not elicit morphological defects in the gin-traps. (B-F) Signal at different developmental stages. (B) First signal is detected immediately after cessation of feeding in late L7. (C) Prepupa (D) 1 day old pupa (E) 2-3 day old pupa (F) 4 day old pupa.

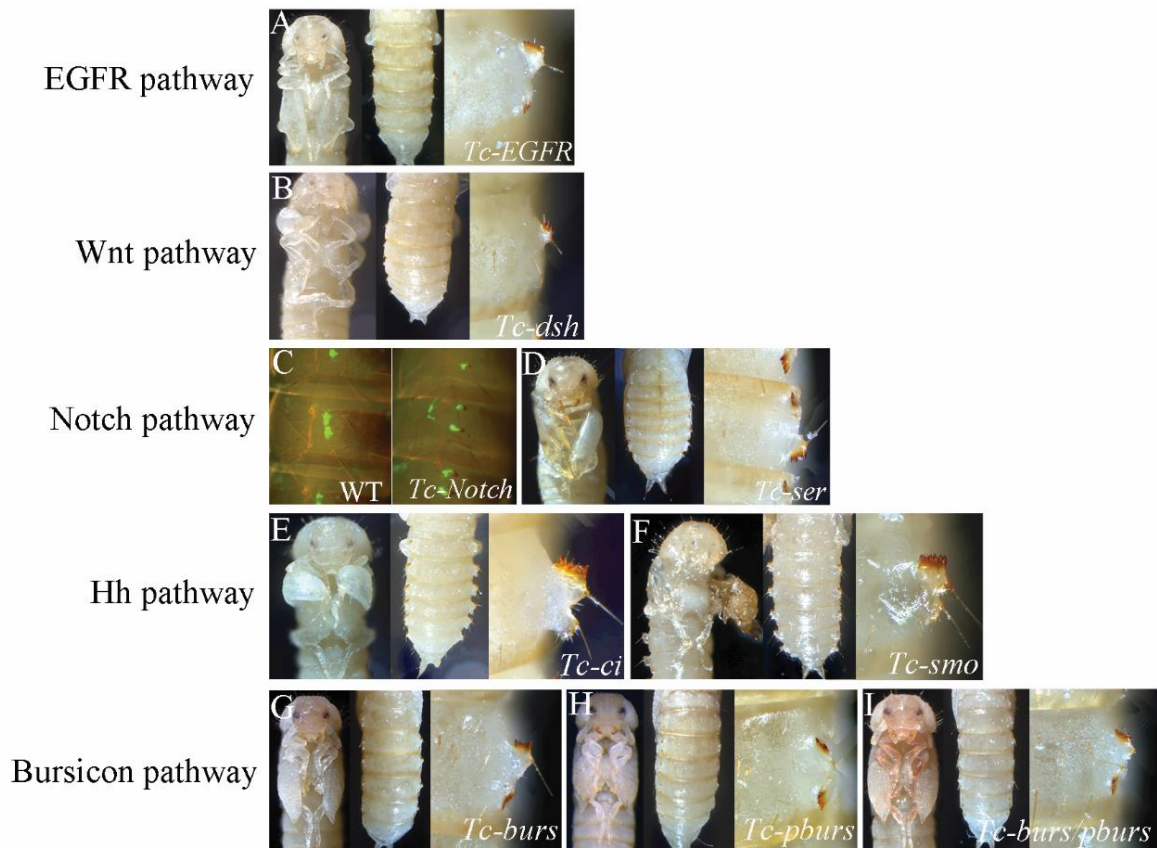

Fig. S2. Effects of five different signaling pathways on gin-trap and wing morphology. (A) *Tc-EGFR* RNAi. (B) *Tc-dsh* RNAi. (C,D) RNAi phenotype of Notch pathway genes: *Tc-Notch* (C) and *Tc-Ser* (D). (E,F) RNAi of *hh* pathway genes: *Tc-ci* (E) and *Tc-smo* (F). (G-I) Genes of the bursicon pathway *Tc-burs* RNAi (G), *pburs* RNAi (H) and *Tc-burs/Tc-pburs* double RNAi (I). Each panel shows ventral view of the pupal wing, dorsal view of the pupal abdomen and close-up of the gin-trap on T3. *Notch* RNAi animals did not molt to pupae, hence the images were captured at the pre-pupal stage in line *GöGal41152* (C).

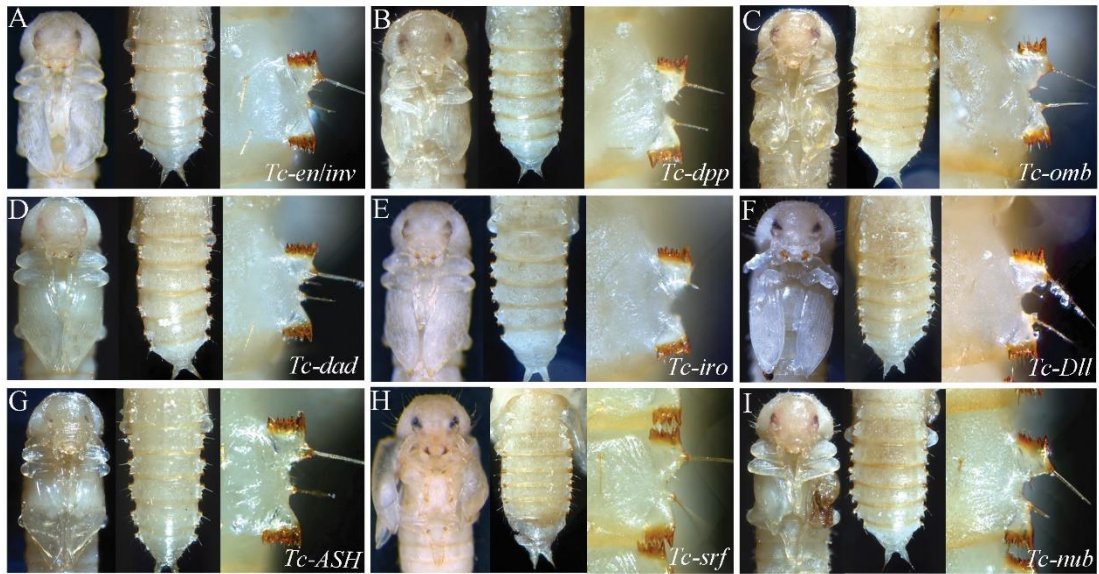

Fig. S3 Wing genes without gin-trap phenotype. (A-I) *Tc-en/inv*, *Tc-dpp*, *Tc-omb*, *Tc-dad*, *Tc-iro*, *Tc-Dll*, *Tc-ASH*, *Tc-srf*, and *Tc-nub*.

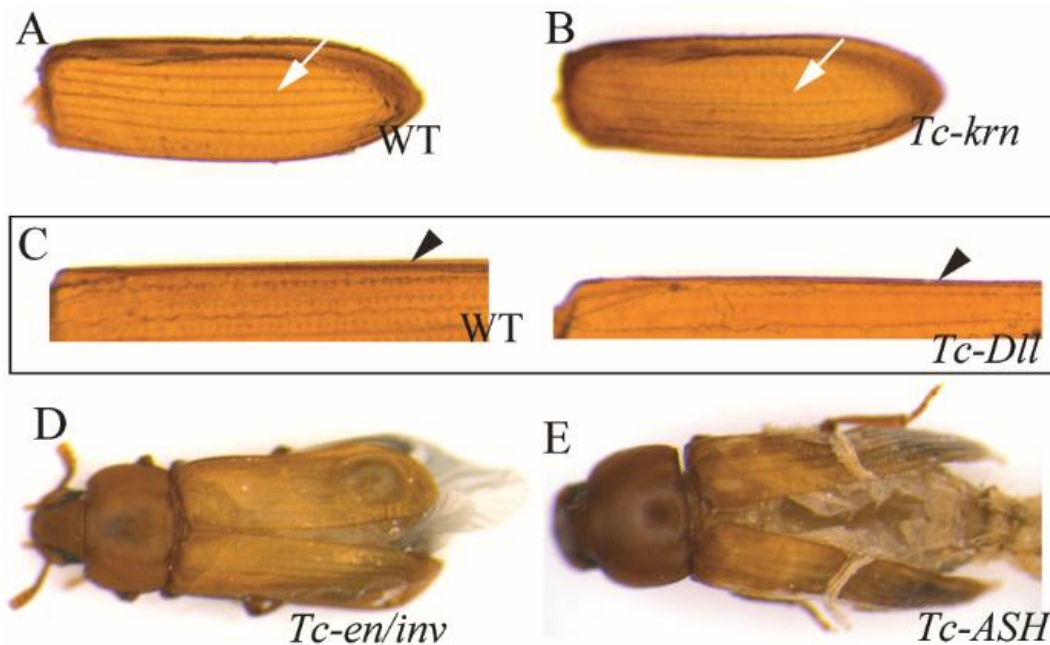

Fig. S4. Effects of RNAi on *Tribolium* adult elytra. (A) Wild type. (B) In *Tc-krn* RNAi the vein pattern of the elytra was affected (compare arrows in A and B). (C) The margin of the elytra was altered after depletion of *Tc-Dll* (arrowheads). (D) *Tc-en/inv* double RNAi led to distal defects in the elytra. (E) *Tc-ASH* RNAi. The development of setae was affected in all epidermal tissues. The wing open phenotype is probably a secondary effect.

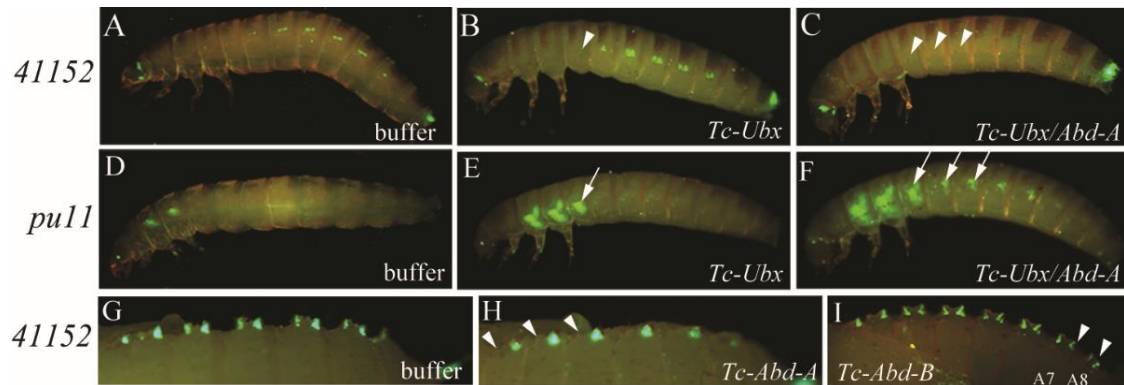

Fig. S5 Effects of Hox genes on gin-trap formation. (A-F) Animals at the prepupal stage injected with buffer (A,D); *Tc-Ubx* dsRNA (B,E) or *Tc-Ubx/Tc-Abd-A* double dsRNA (C,F) in the transgenic lines *GöGal41152* (A-C) or *pu11* (D-F). (G-I) Dorsal view on *GöGal41152* pupae injected with buffer (G), *abdA* (H) and *AbdB* (I). (B,E) In *Tc-Ubx* RNAi the gin-trap marker was lost in A1 (arrowhead in B) but the wing marker appeared at the corresponding position (arrow in E), indicating a transformation from gin-trap to wing identity. (C,F) Double knockdown of *Tc-Ubx* and *Tc-abdA* abolished the gin-trap marker in all abdominal segments (C) while the *pu11* wing marker appeared (F) as reported previously [11,33]. (H) In *Tc-abdA* RNAi pupae the gin-traps on abdominal segments A2 through A6 were more like that in A1, where the anterior part is missing (arrowheads). In strong phenotypes a wing like protrusion formed posterior of gin-traps on A4-A7 (not shown). (I) In *Tc-AbdB* RNAi pupae, the partial gin-trap of A7 (only anterior part is present in wildtype) was complemented by a posterior part and one more pair of intact gin-traps appeared on A8 (arrowheads).

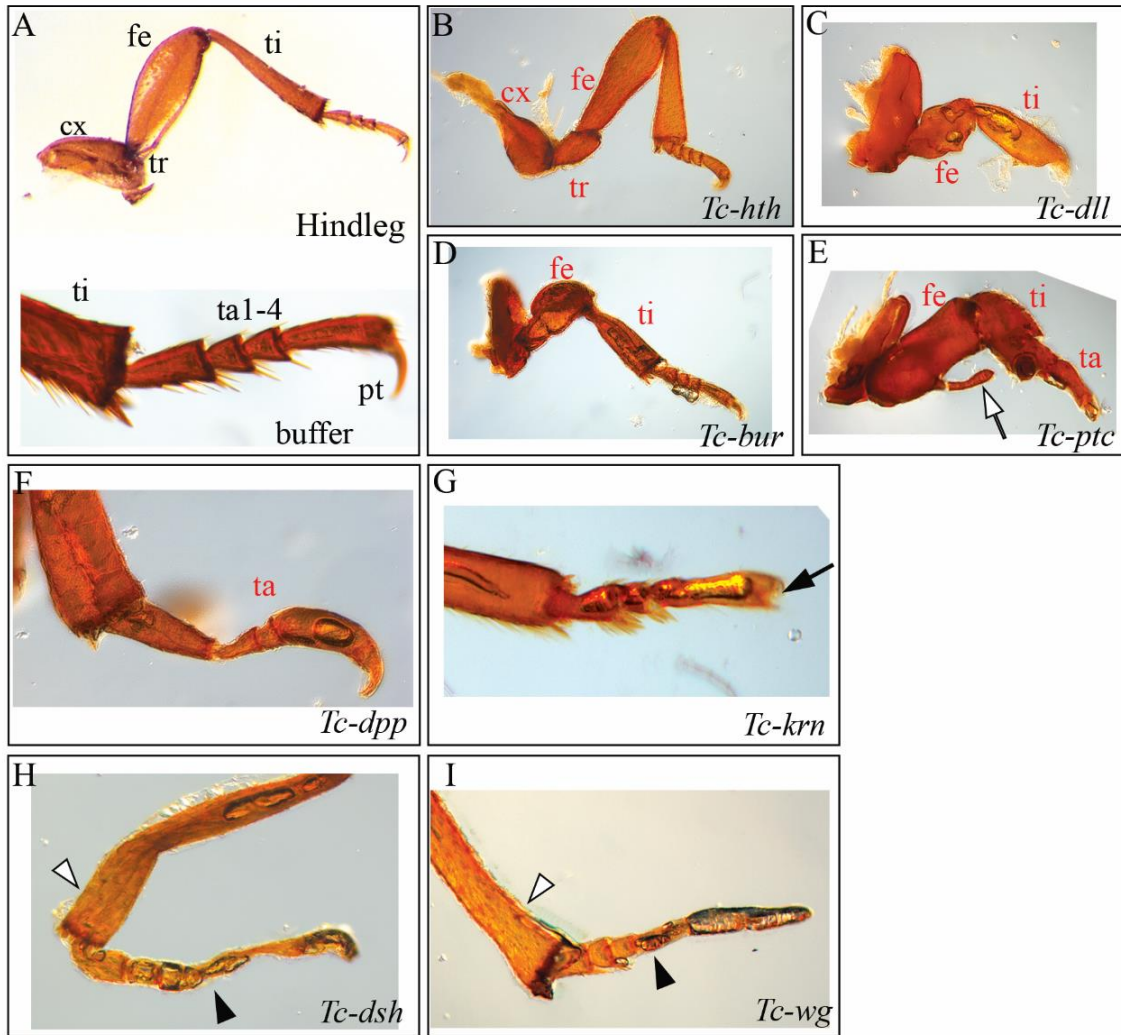

Fig. S6 Effects of wing related genes for adult leg patterning. (A) Hindleg (upper panel) and close-up (lower panel) of tarsus from a buffer injected adult. (B) Depletion of *Tc-hth* induced the transformation of proximal structures (coxa, trochanter, proximal femur) to more distal morphologies. (C) Knocking down of *Tc-Dll* caused the elimination of the segments distal to tibia, and reduction of femur and tibia. (D) The leg was shorter in *Tc-bur* RNAi adults than that in control. (E) Knocking down of *Tc-ptc* led to deformation and fusion of leg segments and ectopic cuticular outgrowth in the femur (open arrow). (F) *Tc-dpp* RNAi resulted in the alteration and partial fusion of tarsomeres. (G) *Tc-krn* caused partial fusion of tarsomeres and elimination of the pretarsus (black arrow). (H and I) Tibia (open arrowhead) and tarsus (black arrowhead) were narrower after knocking down *Tc-dsh* and *Tc-wg*, respectively. Affected structures are marked in red. Abbreviations: cx, coxa; fe, femur; ti, tibia; ta, tarsus; pt, pretarsus.

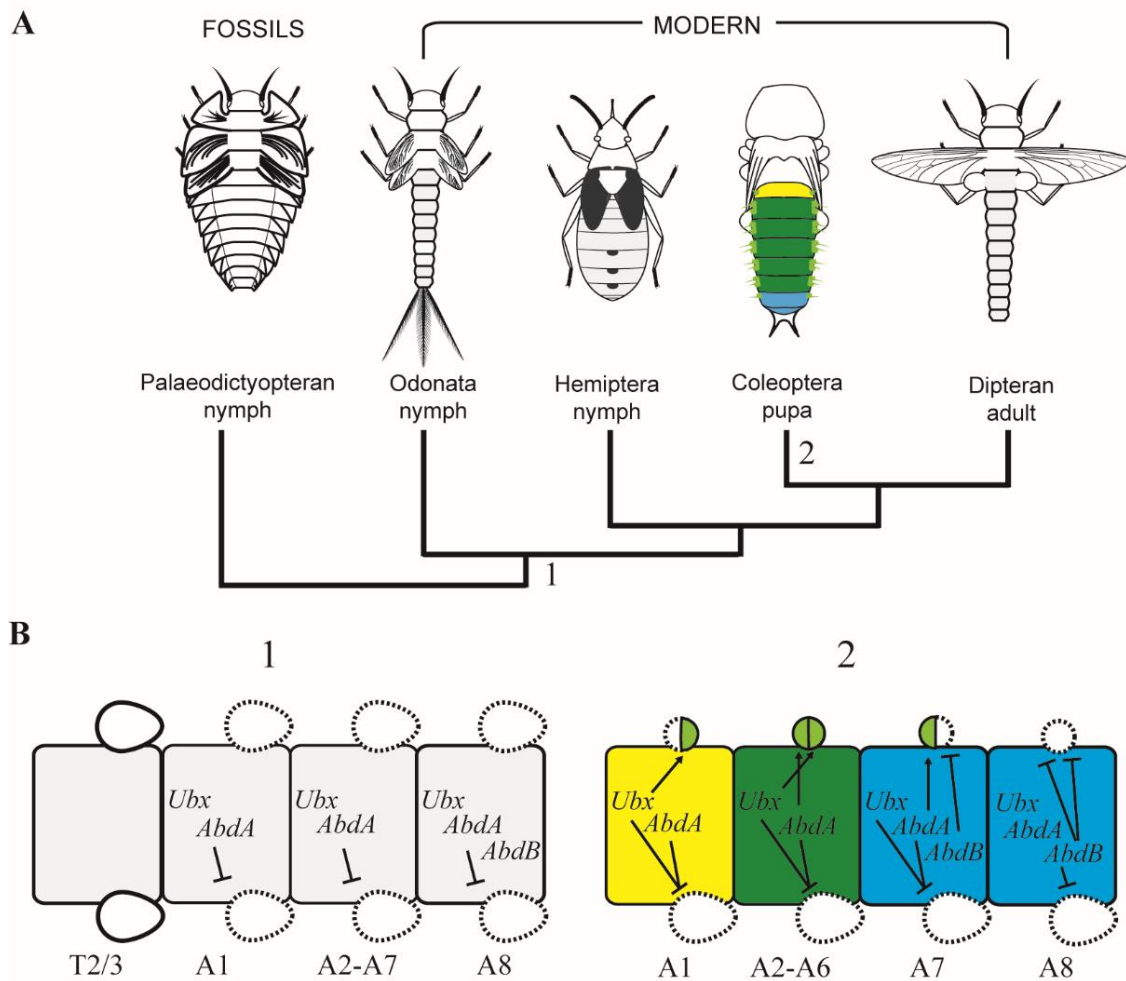

Figure S7 Model for Hox gene function on wings and gin-traps. (A) The fossil record shows early pterygotes with abdominal structures on all thoracic and abdominal segments [57]. Whether these structures are serial homologs to wings remains disputed. B) The wing network probably evolved initially without input from Hox genes because *Antp* is not required for wing formation in extant insects [57]. However, *Ubx* expressed in T3 modified the hindwings to varying degrees in some insect taxa [11,58–60]. Activation of the wing network in abdominal segments was repressed by abdominal Hox genes (B 1). We propose that the first step for gin-trap evolution was a partial de-repression of the wing GRN leading to an outgrowth based on the co-opted wing GRN. Recruitment of novel genes and pruning and regulatory changes in the GRN led to the gin-trap morphology. For instance, co-option of *Tc-caspar* and evolution of an upstream role of *Tc-ems* were probably required to generate the symmetry of gin-traps in an otherwise AP asymmetric segment. Note the asymmetric requirement of *Tc-abdA* and *Tc-Ubx* for anterior versus posterior part of the gin-traps

**Table S1 Primer sequences used in this study**

| primer name | sequence                                          | use                                                                  |
|-------------|---------------------------------------------------|----------------------------------------------------------------------|
| Tc-bursF    | GTGATCCACGTTTTACAATATC                            | Cloning of the region used for RNAi                                  |
| Tc-bursR    | CCTCAACCCAGTGCAGG                                 |                                                                      |
| Tc-pburF    | ACAGAGAATATGCAATGGGGAGG                           | Cloning of the region used for RNAi                                  |
| Tc-pburR    | TCGGCTGAAATCGCCACACT                              |                                                                      |
| Tc-UbxF     | ACTCTTACTTCGAGCAGAGC                              | Cloning of the region used for RNAi                                  |
| Tc-UbxR     | GGTGTATCTGCGTGCCAAC                               |                                                                      |
| T7-pJETF    | GAATTGTAATACGACTCACTATAGGCGACT<br>CACTATAGGGAGAGC | amplify the template for in vitro<br>transcription to generate dsRNA |
| T7-pJETR    | TAATACGACTCACTATAGGAAGAACATCGA<br>TTTTCCATGGCAG   |                                                                      |
| T7          | GAATTGTAATACGACTCACTATAGG                         |                                                                      |
| T7-sp6      | TAATACGACTCACTATAGGATTTAGGTGACA<br>CTATAGA        |                                                                      |
| T7-T3       | TAATACGACTCACTATAGGAATTAACCCTCA<br>CTAAAGGG       |                                                                      |
| iPCR5'F1    | GACGCATGATTATCTTTTACGTGAC                         | 1st round PCR after Bsp143I treatment                                |
| iPCR5'R1    | TGACACTTACCGCATTGACA                              |                                                                      |
| iPCR5'F2    | GCGATGACGAGCTTGTGGTG                              | 2nd round PCR after Bsp143I<br>treatment                             |
| iPCR5'R2    | TCCAAGCGGCGACTGAGATG                              |                                                                      |
| iPCR5'Seq   | CGCGCTATTTAGAAAGAGAGAG                            | sequencing                                                           |
| iPCR3'F1    | CAACATGACTGTTTTTAAAGTACAAA                        | 1st round PCR after HhaI treatment                                   |
| iPCR3'R1    | GTCAGAAACAACCTTTGGCACATATC                        |                                                                      |
| iPCR3'F2    | CCTCGATATACAGACCGATAAAAC                          | 2nd round PCR after HhaI treatment                                   |
| iPCR3'R2    | TGCATTTGCCTTTTCGCTTAT                             |                                                                      |
| iPCR3'Seq   | CGATAAAACACATGCGTCAAT                             | sequencing                                                           |



**Table S2 Summary of iBeetle number, target gene and dsRNA length**

| iBeetle number | Target gene      | dsRNA length |
|----------------|------------------|--------------|
| iB_03555       | <i>Tc-krn</i>    | 510bp        |
| iB_04438       | <i>Tc-rk</i>     | 493bp        |
| iB_04697       | <i>Tc-simj</i>   | 559bp        |
| iB_02268       | <i>Tc-kis</i>    | 470bp        |
| iB_04931       | <i>Tc-vg</i>     | 434bp        |
| iB_04737       | <i>Tc-casp</i>   | 513bp        |
| iB_05098       | <i>Tc-ems</i>    | 481bp        |
| iB_05634       | <i>Tc-mib1</i>   | 476bp        |
| iB_05728       | <i>Tc-Gug</i>    | 495bp        |
| iB_06451       | <i>Tc-Abd-A</i>  | 509bp        |
| iB_03099       | <i>Tc-Abd-B</i>  | 480bp        |
| iB_04526       | <i>Tc-hth</i>    | 530bp        |
| iB_05191       | <i>Tc-tiotsh</i> | 471bp        |
| iB_06279       | <i>Tc-inv</i>    | 535bp        |
| iB_04091       | <i>Tc033998</i>  | 498bp        |
|                | <i>Tc-burs</i>   | 268bp        |
|                | <i>Tc-pburs</i>  | 268bp        |
|                | <i>Tc-Ubx</i>    | 591bp        |
|                | <i>Tc-EGFR</i>   | 974bp        |
|                | <i>Tc-ser</i>    | 610bp        |
|                | <i>Tc-Notch</i>  | 310bp        |
|                | <i>Tc-wg</i>     | 1100bp       |
|                | <i>Tc-en</i>     | 885bp        |
|                | <i>Tc-hh</i>     | 1148bp       |
|                | <i>Tc-smo</i>    | 961bp        |
|                | <i>Tc-ci</i>     | 1351bp       |
|                | <i>Tc-dpp</i>    | 1129bp       |
|                | <i>Tc-omb</i>    | 418bp        |
|                | <i>Tc-iro</i>    | 1043bp       |
|                | <i>Tc-ASH</i>    | 762bp        |
|                | <i>Tc-nub</i>    | 685bp        |
|                | <i>Tc-srf</i>    | 872bp        |
|                | <i>Tc-dad</i>    | 655bp        |
|                | <i>Tc-apA</i>    | 684bp        |
|                | <i>Tc-apB</i>    | 798bp        |
|                | <i>Tc-dsh</i>    | 525bp        |
|                | <i>Tc-sal</i>    | 930bp        |

**Table S3 Summary of off-target controls**

| iBeetle number | RNAi target   | Beetle strain  | number of injected larvae | survival to pupal stage | gin-trap               |            | wing                                                                                                                   |            |
|----------------|---------------|----------------|---------------------------|-------------------------|------------------------|------------|------------------------------------------------------------------------------------------------------------------------|------------|
|                |               |                |                           |                         | phenotype              | penetrance | phenotype                                                                                                              | penetrance |
| iB_03555       | <i>Tc-krn</i> | <i>SB</i>      | 10                        | 7                       | size largely decreased | 100.0%     | slightly smooth elytra surface of pupa, rids or vein developed abnormally and number of setea was less in adult elytra | 100.0%     |
| iB_03555       | <i>Tc-krn</i> | <i>D17×het</i> | 10                        | 9                       | size largely decreased | 100.0%     | slightly smooth elytra surface of pupa, rids or vein developed abnormally and number of setea was less in adult elytra | 100.0%     |
| iB_03555 NOF   | <i>Tc-krn</i> | <i>SB</i>      | 10                        | 7                       | size largely decreased | 100.0%     | slightly smooth elytra surface of pupa, rids or vein developed abnormally and number of setea was less in adult elytra | 100.0%     |
| iB_03555 NOF   | <i>Tc-krn</i> | <i>D17×het</i> | 10                        | 5                       | size largely decreased | 100.0%     | slightly smooth elytra surface of pupa, rids or vein developed abnormally and number of setea was less in adult elytra | 100.0%     |
| iB_04931       | <i>Tc-vg</i>  | <i>SB</i>      | 10                        | 4                       | absent                 | 100.0%     | size largely decreased or absent                                                                                       | 100.0%     |
| iB_04931       | <i>Tc-vg</i>  | <i>D17×het</i> | 10                        | 6                       | absent                 | 100.0%     | size largely decreased or absent                                                                                       | 100.0%     |
| iB_04931 NOF   | <i>Tc-vg</i>  | <i>SB</i>      | 10                        | 3                       | absent                 | 100.0%     | size largely decreased or absent                                                                                       | 100.0%     |

|              |                |                |    |    |                                                                                                 |        |                                           |        |
|--------------|----------------|----------------|----|----|-------------------------------------------------------------------------------------------------|--------|-------------------------------------------|--------|
| iB_04931 NOF | <i>Tc-vg</i>   | <i>D17×het</i> | 10 | 5  | largely decreased or absent                                                                     | 100.0% | size largely decreased or absent          | 100.0% |
| iB_04697     | <i>Tc-simj</i> | <i>SB</i>      | 10 | 6  | largely decreased                                                                               | 83.3%  | smaller and a little deformed             | 83.3%  |
| iB_04697     | <i>Tc-simj</i> | <i>D17×het</i> | 10 | 10 | largely decreased                                                                               | 100.0% | size smaller and distal part more rounded | 70.0%  |
| iB_04697 NOF | <i>Tc-simj</i> | <i>SB</i>      | 10 | 2  | largely decreased                                                                               | 100.0% | size smaller and orientation irregular    | 100.0% |
| iB_04697 NOF | <i>Tc-simj</i> | <i>D17×het</i> | 12 | 9  | largely decreased                                                                               | 100.0% | size smaller and orientation irregular    | 100.0% |
| iB_04737     | <i>Tc-Casp</i> | <i>SB</i>      | 9  | 5  | largely decreased, some showed anterior gin-trap had stronger phenotype than posterior gin-trap | 100.0% | no phenotype                              | 0.0%   |
| iB_04737     | <i>Tc-Casp</i> | <i>D17×het</i> | 10 | 8  | largely decreased, some showed anterior gin-trap had stronger phenotype than posterior gin-trap | 100.0% | no phenotype                              | 0.0%   |
| iB_04737 NOF | <i>Tc-Casp</i> | <i>SB</i>      | 10 | 4  | anterior gin-trap largely decreased, posterior gin-trap slightly decreased                      | 100.0% | no phenotype                              | 0.0%   |

|              |                |                |    |   |                                                                                     |        |                                                 |        |
|--------------|----------------|----------------|----|---|-------------------------------------------------------------------------------------|--------|-------------------------------------------------|--------|
| iB_04737 NOF | <i>Tc-Casp</i> | <i>D17×het</i> | 9  | 3 | anterior gin-trap<br>largely decreased,<br>posterior gin-trap<br>slightly decreased | 66.7%  | no phenotype                                    | 0.0%   |
| iB_05728     | <i>Tc-Gug</i>  | <i>SB</i>      | 10 | 2 | largely decreased                                                                   | 100.0% | elytra size a little smaller, smooth<br>surface | 100.0% |
| iB_05728     | <i>Tc-Gug</i>  | <i>D17×het</i> | 10 | 1 | largely decreased                                                                   | 100.0% | elytra size a little smaller, smooth<br>surface | 100.0% |
| iB_05728 NOF | <i>Tc-Gug</i>  | <i>SB</i>      | 15 | 5 | largely decreased                                                                   | 80.0%  | elytra size a little smaller, smooth<br>surface | 80.0%  |
| iB_05728 NOF | <i>Tc-Gug</i>  | <i>D17×het</i> | 10 | 5 | largely decreased                                                                   | 100.0% | elytra size a little smaller, smooth<br>surface | 100.0% |
| iB_05634     | <i>Tc-mib1</i> | <i>SB</i>      | 10 | 2 | moderately smaller                                                                  | 100.0% | mostly absent                                   | 100.0% |
| iB_05634     | <i>Tc-mib1</i> | <i>D17×het</i> | 8  | 7 | moderately smaller,<br>orientation irregular                                        | 100.0% | largely decreased or absent                     | 100.0% |
| iB_05634 NOF | <i>Tc-mib1</i> | <i>SB</i>      | 12 | 1 | mildly or moderately<br>smaller and<br>orientation irregular                        | 100.0% | largely decreased                               | 100.0% |
| iB_05634 NOF | <i>Tc-mib1</i> | <i>D17×het</i> | 10 | 2 | slightly smaller,<br>orientation irregular                                          | 100.0% | largely decreased or absent                     | 100.0% |
| iB_04438     | <i>Tc-rk</i>   | <i>SB</i>      | 10 | 2 | slightly smaller,<br>orientation irregular                                          | 100.0% | a little shorter, wrinkled surface              | 100.0% |

|              |               |                |    |    |                                                                                                                                 |        |                                                   |        |
|--------------|---------------|----------------|----|----|---------------------------------------------------------------------------------------------------------------------------------|--------|---------------------------------------------------|--------|
| iB_04438     | <i>Tc-rk</i>  | <i>D17×het</i> | 10 | 7  | slightly smaller,<br>orientation irregular                                                                                      | 100.0% | a little shorter, orientation<br>irregular        | 100.0% |
| iB_04438 NOF | <i>Tc-rk</i>  | <i>SB</i>      | 10 | 10 | slightly smaller,<br>orientation irregular                                                                                      | 100.0% | a little shorter, wrinkled surface                | 100.0% |
| iB_04438 NOF | <i>Tc-rk</i>  | <i>D17×het</i> | 10 | 6  | slightly smaller,<br>orientation irregular                                                                                      | 100.0% | a little shorter, wrinkled surface                | 100.0% |
| iB_05098     | <i>Tc-ems</i> | <i>SB</i>      | 17 | 15 | size decreased,<br>anterior gin-trap<br>largely decreased or<br>absent, posterior gin-<br>trap moderately or<br>largely smaller | 100.0% | elytra a little shorter                           | 33.3%  |
| iB_05098     | <i>Tc-ems</i> | <i>D17×het</i> | 20 | 5  | anterior gin-trap size<br>largely decreased                                                                                     | 100.0% | elytra a little shorter and surface<br>irregular  | 80.0%  |
| iB_05098 NOF | <i>Tc-ems</i> | <i>SB</i>      | 10 | 9  | shape irregular,<br>anterior gin-trap<br>smaller and less<br>sclerotized jaw                                                    | 44.4%  | no phenotype                                      | 0.0%   |
| iB_05098 NOF | <i>Tc-ems</i> | <i>D17×het</i> | 12 | 8  | size decreased,<br>anterior gin-trap size<br>largely decreased                                                                  | 100.0% | no phenotype                                      | 0.0%   |
| iB_02268     | <i>Tc-kis</i> | <i>SB</i>      | 18 | 18 | moderately or largely<br>decreased                                                                                              | 100.0% | a little shorter, some showed<br>blistered elytra | 100.0% |

|              |                 |                |    |    |                                                                                   |        |                  |        |
|--------------|-----------------|----------------|----|----|-----------------------------------------------------------------------------------|--------|------------------|--------|
| iB_02268     | <i>Tc-kis</i>   | <i>D17×het</i> | 20 | 13 | moderately decreased                                                              | 100.0% | slightly shorter | 100.0% |
| iB_02268 NOF | <i>Tc-kis</i>   | <i>SB</i>      | 18 | 17 | moderately or largely decreased                                                   | 100.0% | slightly shorter | 100.0% |
|              | <i>Tc-kis</i>   | <i>D17×het</i> | 20 | 15 | moderately decreased                                                              | 100.0% | slightly shorter | 100.0% |
| iB_06451     | <i>Tc-Abd-A</i> | <i>SB</i>      | 10 | 7  | anterior gin-trap largely decreased, proximal part of gin-traps a little expanded | 100.0% | no phenotype     | 0.0%   |
| iB_06451     | <i>Tc-Abd-A</i> | <i>D17×het</i> | 10 | 8  | anterior gin-trap largely decreased, proximal part of gin-traps a little expanded | 87.5%  | no phenotype     | 0.0%   |
| iB_06451 NOF | <i>Abd-A</i>    | <i>SB</i>      | 16 | 12 | anterior gin-trap largely decreased, proximal part of gin-traps a little expanded | 100.0% | no phenotype     | 0.0%   |
| iB_06451 NOF | <i>Abd-A</i>    | <i>D17×het</i> | 10 | 3  | anterior gin-trap largely decreased                                               | 100.0% | no phenotype     | 0.0%   |

NOF: non-overlapping fragment of dsRNA

penetrance: proportion of pupae with phenotype in all the survived pupae

*D17×het* is the genetic background used in the *iBeetle* screen.

**Table S4 Classification of genes**

| <b>Candidate genes from the known wing gene regulatory network (i.e. phenotype in both <i>Drosophila</i> and <i>Tribolium</i>)</b>                                                                                                                                                                                                                                                                                                                                                                                                                               |                                                                                                          |                                                                                                                                                          |                                          |
|------------------------------------------------------------------------------------------------------------------------------------------------------------------------------------------------------------------------------------------------------------------------------------------------------------------------------------------------------------------------------------------------------------------------------------------------------------------------------------------------------------------------------------------------------------------|----------------------------------------------------------------------------------------------------------|----------------------------------------------------------------------------------------------------------------------------------------------------------|------------------------------------------|
|                                                                                                                                                                                                                                                                                                                                                                                                                                                                                                                                                                  | <b>only wing</b>                                                                                         | <b>wing and gin-trap</b>                                                                                                                                 | <b>only gin-trap</b>                     |
| <b>pathways</b>                                                                                                                                                                                                                                                                                                                                                                                                                                                                                                                                                  | Dpp                                                                                                      | Hh <sup>1</sup><br>Wnt <sup>2</sup><br>Notch<br>EGFR                                                                                                     |                                          |
| <b>genes</b>                                                                                                                                                                                                                                                                                                                                                                                                                                                                                                                                                     | <i>optomotor-blind</i><br><i>srf</i><br><i>nubbin</i><br><i>engrailed/invected</i><br><i>Distal-less</i> | <i>apterous</i><br><i>vestigial</i><br><i>teashirt</i><br><i>homothorax</i><br><i>spalt</i><br><i>Grunge/atrophin</i>                                    |                                          |
| <b>Novel genes identified in the iBeetle screen</b>                                                                                                                                                                                                                                                                                                                                                                                                                                                                                                              |                                                                                                          |                                                                                                                                                          |                                          |
|                                                                                                                                                                                                                                                                                                                                                                                                                                                                                                                                                                  | <b>only wing</b>                                                                                         | <b>wing and gin-trap</b>                                                                                                                                 | <b>only gin-trap</b>                     |
| <b>pathways</b>                                                                                                                                                                                                                                                                                                                                                                                                                                                                                                                                                  |                                                                                                          |                                                                                                                                                          | <i>caspar</i> <sup>3</sup><br>(immunity) |
| <b>genes</b>                                                                                                                                                                                                                                                                                                                                                                                                                                                                                                                                                     |                                                                                                          | <i>kismet</i><br><i>simjang</i><br><i>ems</i> <sup>3</sup>                                                                                               |                                          |
| <b>Gene identified in the iBeetle screen but previously known in wing development in <i>Tribolium</i></b>                                                                                                                                                                                                                                                                                                                                                                                                                                                        |                                                                                                          |                                                                                                                                                          |                                          |
|                                                                                                                                                                                                                                                                                                                                                                                                                                                                                                                                                                  | <b>only wing</b>                                                                                         | <b>wing and gin-trap</b>                                                                                                                                 | <b>only gin-trap</b>                     |
| <b>pathways</b>                                                                                                                                                                                                                                                                                                                                                                                                                                                                                                                                                  |                                                                                                          | Bursicon<br>(neuropeptide)                                                                                                                               |                                          |
| <b>Notes</b>                                                                                                                                                                                                                                                                                                                                                                                                                                                                                                                                                     |                                                                                                          |                                                                                                                                                          |                                          |
| <sup>1</sup> only posterior part of gin-trap affected                                                                                                                                                                                                                                                                                                                                                                                                                                                                                                            |                                                                                                          | In <i>Tribolium</i> , <i>Tc-iroquois</i> & <i>Tc-ASH</i> RNAi affected bristles on the entire cuticle – therefore not scored as specific wing phenotype. |                                          |
| <sup>2</sup> mainly posterior but also anterior part                                                                                                                                                                                                                                                                                                                                                                                                                                                                                                             |                                                                                                          |                                                                                                                                                          |                                          |
| <sup>3</sup> only anterior part of gin-trap affected                                                                                                                                                                                                                                                                                                                                                                                                                                                                                                             |                                                                                                          |                                                                                                                                                          |                                          |
| <b>Genes/pathways affecting wing patterning:</b><br>n=20<br>6 do not affect gin-traps (30%)<br>3 novel in wing patterning (15%)                                                                                                                                                                                                                                                                                                                                                                                                                                  |                                                                                                          | <b>Genes/pathways affecting gin-traps:</b><br>n=15<br>1 affects only gin-traps (6.6%)                                                                    |                                          |
| <b>Estimation of total number of co-opted genes:</b><br>So far, 28% of the genome was screened for metamorphosis phenotypes. In this randomly selected gene set, we found 3 novel genes involved in wing and gin-trap formation and 1 gene active in gin-traps only. Screening the other 72% of the genome we expect at least another 8 genes of the former and 2 genes of the latter category. Together with the genes found by screening wing GRN candidates this would sum up to 25 genes required for gin-trap formation of which 3 would be co-opted (12%). |                                                                                                          |                                                                                                                                                          |                                          |
